# 1      **Parallels between experimental and natural evolution of** 2                                    **legume symbionts**

3      Running title: Experimental versus natural evolution

4

5      Camille Clerissi<sup>1,2,3</sup>, Marie Touchon<sup>1,2</sup>, Delphine Capela<sup>3</sup>, Mingxing Tang<sup>3</sup>, Stéphane  
6      Cruveiller<sup>4</sup>, Matthew A. Parker<sup>5</sup>, Lionel Moulin<sup>6</sup>, Catherine Masson-Boivin<sup>3,\*</sup>, Eduardo P.C.  
7      Rocha<sup>1,2,\*</sup>

8      1, Microbial Evolutionary Genomics, Institut Pasteur, 28 rue Dr. Roux, 75015, Paris, France.

9      2, CNRS, UMR3525, 28 rue Dr. Roux, 75015, Paris, France.

10     3, LIPM, Université de Toulouse, INRA, CNRS, Castanet-Tolosan, France.

11     4, CEA/FAR, Institut de Génomique, 2 rue Gaston Crémieux, 91057, Evry, France.

12     5, Department of Biological Sciences, State University of New York, Binghamton, NY  
13     13902, USA.

14     6, IRD, Cirad, Université de Montpellier, IPME, Montpellier, France

15

## 16     **\* Materials & Correspondence:**

17     Eduardo P.C. Rocha, Microbial Evolutionary Genomics, Institut Pasteur, 25 Rue Dr. Roux,  
18     75724 Paris, France. [erocha@pasteur.fr](mailto:erocha@pasteur.fr)

19     Catherine Masson-Boivin, LIPM, Université de Toulouse, INRA, CNRS, Castanet-Tolosan,  
20     France [Catherine.masson@inra.fr](mailto:Catherine.masson@inra.fr)

21

22     152 words for the abstract and 3626 words for the text (without Methods or legends).

23     Keywords: comparative genomics, experimental evolution, bacterial evolution, horizontal  
24     gene transfer, symbiosis, rhizobia.

## 25 **Abstract**

26 The emergence of symbiotic interactions has been studied using population genomics in  
27 nature and experimental evolution in the laboratory, but the parallels between these processes  
28 remain unknown. We compared the emergence of rhizobia after the horizontal transfer of a  
29 symbiotic plasmid in natural populations of *Cupriavidus taiwanensis*, over 10 MY ago, with  
30 the experimental evolution of symbiotic *Ralstonia solanacearum* for a few hundred  
31 generations. In spite of major differences in terms of time-span, environment, genetic  
32 background and phenotypic achievement, both processes resulted in rapid diversification  
33 dominated by purifying selection concomitant with acquisition of positively selected  
34 mutations. The latter were lacking in the plasmid carrying the genes responsible for the  
35 ecological transition. Instead, adaptation targeted the same set of genes leading to the co-  
36 option of the same quorum-sensing system. Our results provide evidence for similarities in  
37 experimental and natural evolutionary transitions and highlight the potential of comparisons  
38 between both processes to understand symbiogenesis.

39

40 Biological adaptations have traditionally been evaluated by inferring the evolutionary history  
41 of organisms from the genomic, morphological, and phenotypic comparison of natural  
42 isolates, including fossil records when they were available. Recently, these approaches have  
43 been increasingly complemented by experimental evolution studies. The latter can be done on  
44 controlled environments and provide nearly complete “fossil” records of past events because  
45 individuals from intermediate points in the experiment can be kept for later analysis <sup>1,2</sup>.  
46 Sequencing and phenotyping of evolved clones provides crucial information on the  
47 mechanisms driving adaptation in simplified environments. Yet, there is little data on the  
48 adaptation of lineages in the case of complex adaptations requiring numerous steps and even  
49 less on how they recapitulate natural processes (but see <sup>3,4</sup>), raising doubts on the applicability  
50 and relevance of experimental evolution studies to understand natural history <sup>5</sup>.

51 Adaptations to new and complex environments, such as ecological transitions towards  
52 pathogenic or mutualistic symbiosis, are often initiated by the acquisition via horizontal  
53 transfer of genes that provide novel functionalities <sup>6</sup>. For example, the extreme virulence of  
54 *Shigella* spp., *Yersinia pestis*, or *Bacillus anthracis* results from the acquisition of plasmid-  
55 encoded virulence factors by otherwise poorly virulent clones. These novel genetic systems  
56 often require subsequent regulatory rewiring, a process that may take hundreds to millions of  
57 years *in natura* <sup>7</sup>. A striking case of horizontal gene transfer (HGT)-mediated transition  
58 towards mutualism concerns the rhizobium-legume symbiosis, a symbiosis of major  
59 ecological importance that contributes to ca. 25% of the global nitrogen cycling. Rhizobia  
60 induce the formation of new organs, the nodules, on the root of legumes, which they colonize  
61 intracellularly and in which they fix nitrogen to the benefit of the plant <sup>8</sup>. These symbiotic  
62 capacities emerged several times in the natural history of  $\alpha$ - and  $\beta$ -Proteobacteria, from the  
63 horizontal transfer of the key symbiotic genes into soil free-living bacteria (*i.e.*, the *nod* genes  
64 for organ formation and the *nif/fix* genes for nitrogen fixation) <sup>9-11</sup>. This process resulted in  
65 hundreds of rhizobial species scattered in 14 known genera, including the genus *Cupriavidus*  
66 in  $\beta$ -proteobacteria <sup>12</sup>.

67 Transition towards legume symbiosis has recently been tested at the laboratory time-scale  
68 using an experimental system <sup>13</sup>. A plant pathogen was evolved to become a legume symbiont  
69 by mimicking the natural evolution of rhizobia at an accelerated pace. First, the plasmid

70 pRalta<sup>LMG19424</sup> - encoding the key genes allowing the symbiosis between *C. taiwanensis*  
71 LMG19424<sup>14</sup> and *Mimosa* – was introduced into *Ralstonia solanacearum* GMI1000. The  
72 resulting chimera was further evolved under *Mimosa pudica* selective pressure. The chimeric  
73 ancestor, which was strictly extracellular and pathogenic on *Arabidopsis thaliana* - but not on  
74 *M. pudica* and unable to nodulate it - progressively adapted to become a legume symbiont  
75 during serial cycles of inoculation to the plant and subsequent re-isolation from nodules  
76 <sup>13,15,16</sup>. Several adaptive mutations driving acquisition and/or drastic improvement of  
77 nodulation and infection were previously identified <sup>13,17,18</sup>. Lab-evolution was accelerated by  
78 stress-responsive error-prone DNA polymerases encoded in the plasmid that increased the  
79 mutation load *ex planta* <sup>19</sup>.

80 Here we compare the natural and experimental evolutions of *Mimosa* symbionts in the  
81 *Cupriavidus/Ralstonia* branch using population genomics and functional enrichment analyses.  
82 We traced the natural evolutionary history of *Cupriavidus taiwanensis* and provide evidence  
83 that, despite significant differences in terms of time frame, protagonists, and environmental  
84 context, there were very significant parallels in the two processes.

85

## 86 Results

### 87 Diversification of naturally and experimentally evolved *Mimosa* symbionts

88 We previously generated 18 independent symbiotic lineages of the *R. solanacearum*  
 89 GMI1000-pRalta<sup>LMG19424</sup> chimeras that nodulate *M. pudica*<sup>15</sup>. Each lineage was subject to 16  
 90 successive cycles of evolution in presence of the plant. We isolated one clone in each of the  
 91 lineages after the final cycle to identify its genetic and phenotypic differences relative to the  
 92 ancestor. The symbiotic performances of the evolved clones improved in the experiment with  
 93 wide variations between lineages. Some clones were able to produce nodules massively and  
 94 intracellularly infected (Fig. 1A). Yet none of them fixed nitrogen to the benefit of the plant at  
 95 this stage. In addition to a total of ca. 1200 point mutations relative to the ancestral clones<sup>15</sup>,  
 96 we detected several large deletions in all clones (Fig. 1A). The positions of point mutations  
 97 were different between lineages, but some genes and many functional categories were  
 98 affected in parallel (Fig. 1B). In contrast, the deletions showed frequent parallelisms at the  
 99 nucleotide level. They occurred in homologous regions of the symbiotic plasmid and were  
 100 systematically flanked by transposable elements that probably mediated their loss by  
 101 recombination (Table S1).

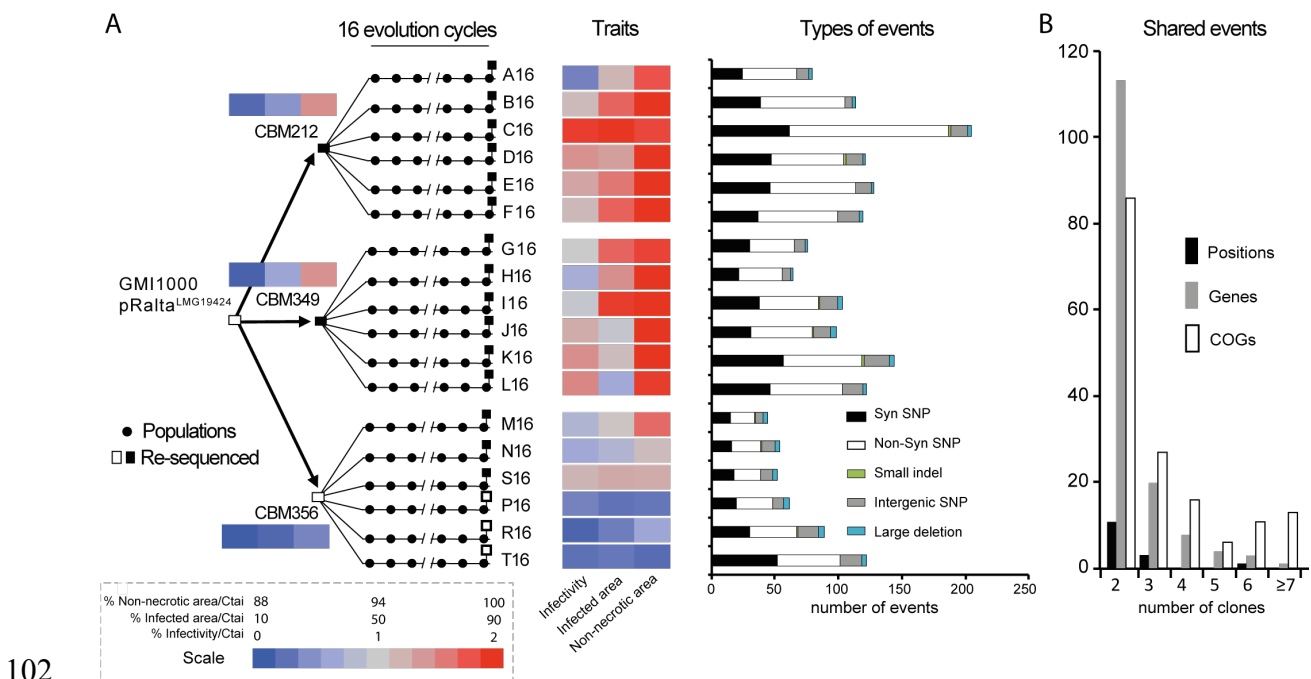

**Figure 1. Experimental evolution of *Ralstonia* and associated symbiotic and genomic changes.** **A.** An ancestor chimeric clone evolved to give origin to three clones able to nodulate *M. pudica*. Each of these clones was then evolved in 18 independent lineages using 16 serial

106 nodulation cycles. This process led to improved infectivity (number of viable bacteria recovered  
107 per nodule) and intracellularly-infected area per nodule section and a decrease of necrotic area  
108 per nodule section (heatmap on traits). Except clones CBM356, P16, R16 and T16 (white  
109 squares), all acquired the ability of intracellular infection (black squares.) The events identified  
110 at the end of the 16 evolution cycles for each lineage are indicated on the right (see list of  
111 deletions in Table S1 and other mutations in Table S12). **B.** Number of shared events between  
112 lineages, *i.e.* the number of positions, genes, and COG categories of genes that were mutated in  
113 two or more lineages.

114 We sequenced, or collected from public databanks, the genomes of 58 *Cupriavidus* strains to  
115 study the genetic changes associated with the natural emergence of *Mimosa* symbionts in the  
116 genus and to compare them with those observed in the experiment (see supplementary Text  
117 S1 and associated tables for data sources, coverage, and details of the results). The phylogeny  
118 of the genus core genome was well resolved, showing that 44 out of the 46 genomes with the  
119 *nod* and *nif* genes were in the monophyletic *C. taiwanensis* clade (Fig. 2). The two  
120 exceptions, strains UYPR2.512 and amp6, were placed afar from this clade in the  
121 phylogenetic tree and are clearly distinct species. *C. taiwanensis* strains are *bona fide*  
122 symbionts since they fixed nitrogen in symbiosis with *M. pudica*<sup>20,21</sup>. Unexpectedly, the  
123 average nucleotide identity (ANIb) values between *C. taiwanensis* strains were often lower  
124 than 94%, showing the existence of abundant polymorphism and suggesting that *C.*  
125 *taiwanensis* is not a single species, but a complex of several closely related ones (Fig. 2 and  
126 S1, Text S1, Table S2). Together, *C. taiwanensis* strains had a core genome of 3568 protein  
127 families and an open pan genome, 3.4 times larger than the average genome. Hence, this  
128 complex of species has very diverse gene repertoires.

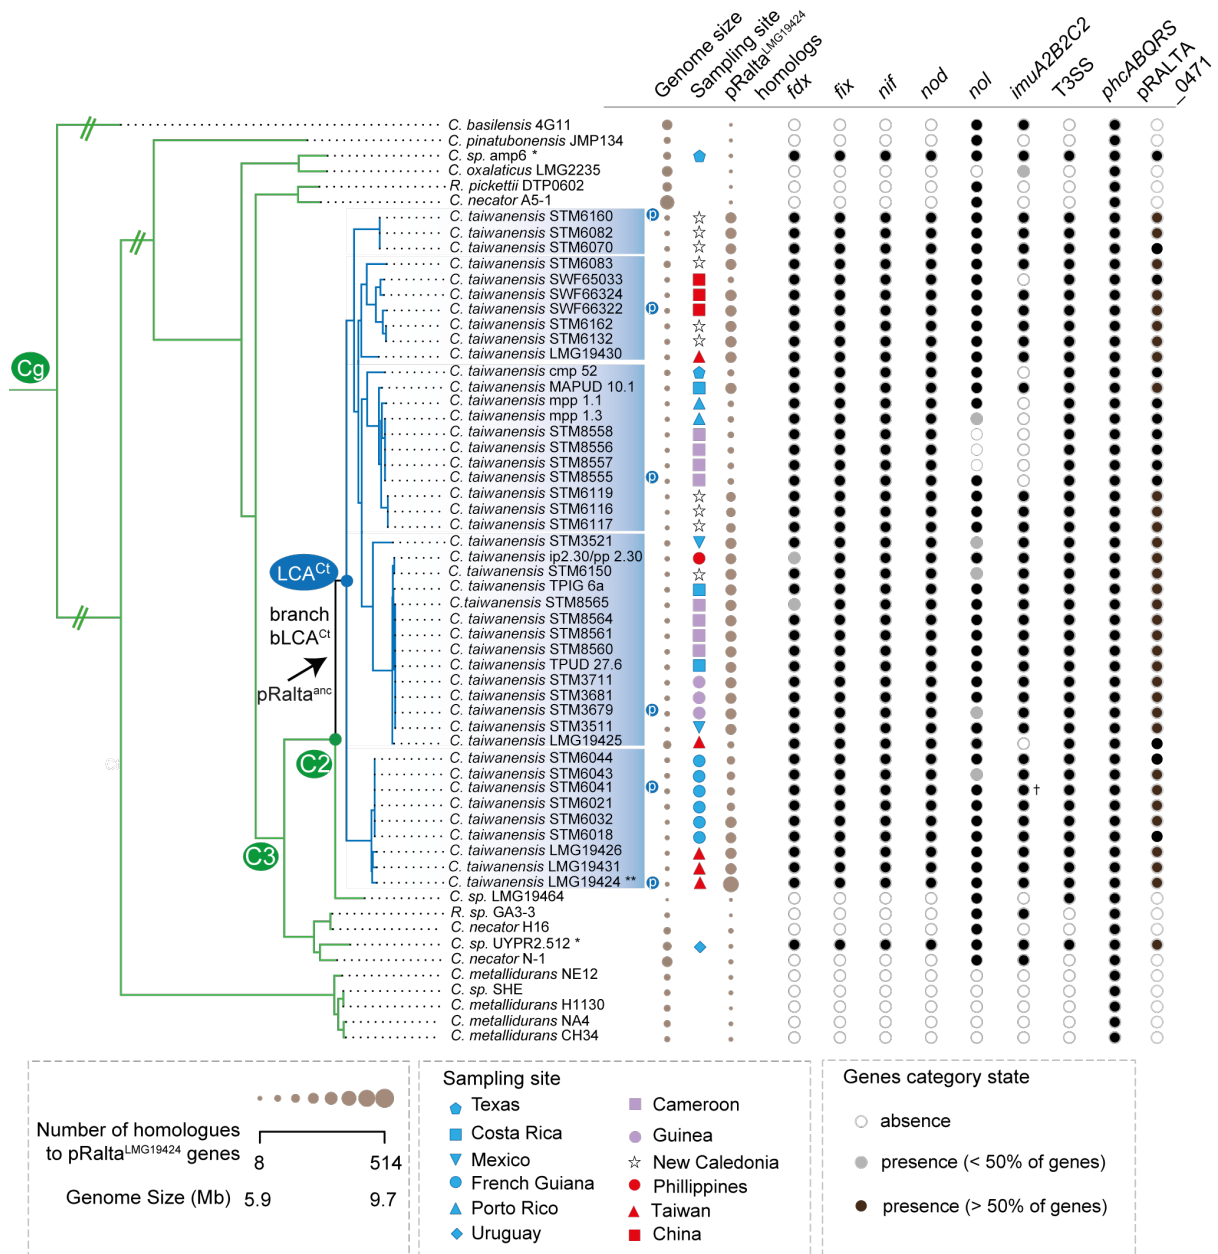

129

130 **Figure 2. Distribution of symbiotic genes, the mutagenic cassette, T3SS, *imuA2B2C2* and**  
 131 ***phcABQRS* within the 60 strains of *Cupriavidus*.** See Fig. S1 for the complete tree of the  
 132 genus *Cupriavidus* and *Ralstonia* without simplifications in branch length. The arrow indicates  
 133 the most parsimonious scenarios for the acquisition of pRalta (inferred using the MPR function  
 134 of the ape package in R). This is the branch before the LCA<sup>Ct</sup>. The node LCA<sup>Ct</sup> indicates the last  
 135 common ancestor of *C. taiwanensis*. Circles indicate absence (white), presence of less than 50%  
 136 of the genes (light grey) and presence of more than 50% of the genes (black). Note that most  
 137 rhizobia possess the pRalta\_0471 gene which is located downstream a *nod* box in LMG19424.  
 138 The size of the circles for *Genome size* and *pRalta homologs* is proportional to the value of the  
 139 variable. Sampling sites are coded according to geographic origins. Clusters were computed  
 140 according to different thresholds of ANIb (as indicated in the text and in Figs. S1 and S8).

141 Symbols: Ct, C2, C3 and Cg: LCA of clades analyzed in this study. p (in a blue circle): plasmid  
142 re-sequenced by PacBio. \*: two rhizobia are not part of *C. taiwanensis*. \*\*: *C. taiwanensis*  
143 reference strain used as pivot to compute searches of orthologs. † In the PacBio version of this  
144 genome *imuABC* is very similar to that of the reference strain, but is encoded in another  
145 plasmid.

## 146 **Parallel patterns of evolution upon the acquisition of the symbiotic plasmid**

147 To compare the initial stages of adaptation in natural populations with those in experimental  
148 populations, we searched to identify when the rhizobial character (defined by the presence of  
149 the key symbiotic genes *nod* and *nif/fix*), was acquired in the genus *Cupriavidus* (Figs. 2 and  
150 S2). The most parsimonious reconstruction of the character in the phylogenetic tree revealed  
151 three independent transitions towards symbiosis: in the branch connecting the last common  
152 ancestor of *C. taiwanensis* and its immediate ancestor (branch before LCA<sup>Ct</sup>, hereafter named  
153 bLCA<sup>Ct</sup>), and in the terminal branches leading to strains UYPR2.512 and amp6. In agreement  
154 with these conclusions, we found very few homologs of the 514 pRalta<sup>LMG19424</sup> genes in the  
155 genomes of UYPR2.512 (8.3 %) or amp6 (6.4%) once the 32 symbiotic genes were excluded  
156 from the analysis. These few homologs in the plasmid also showed significantly lower values  
157 of sequence similarity than the core genes of the genus ( $p < 0.01$ , Wilcoxon test). We then used  
158 birth-death models to identify the acquisitions of genes in the branch bLCA<sup>Ct</sup> (Fig. 2, Table  
159 S3). This analysis highlighted a set of 435 gene acquisitions that were present in  
160 pRalta<sup>LMG19424</sup>, over-representing functions such as symbiosis, plasmid biology, and type 4  
161 secretion system (Table S4). These results are consistent with a single initial acquisition of the  
162 plasmid in this clade. PacBio resequencing of five strains representative of the main lineages,  
163 putative novel species, of *C. taiwanensis* confirmed the ubiquitous presence of a variant of  
164 pRalta encoding the symbiotic genes (Table S5). Finally, while most individual *C.*  
165 *taiwanensis* core gene trees showed some level of incongruence with the concatenate core  
166 genome tree, an indication of recombination, this frequency was actually lower in the core  
167 genes of the plasmid ( $p < 0.04$ , Fisher's exact test). Similarly, there were fewer signals of  
168 intragenic recombination in plasmid core genes (PHI,  $p < 0.001$ , same test). This suggests that  
169 the plasmid inheritance was mostly vertical within *C. taiwanensis*. We thus concluded that the  
170 three rhizobial clades evolved independently and that the acquisition of the ancestral  
171 symbiotic plasmid of *C. taiwanensis* should be placed at the branch bLCA<sup>Ct</sup>. The date of  
172 plasmid acquisition was estimated using a 16S rRNA clock in the range 12-16 MY ago.  
173 Although these dating procedures are only approximate, the values are consistent with the low



174 ANIb values within *C. taiwanensis* and are posterior to the radiation of its most typical host  
175 (*Mimosa*<sup>22</sup>).

176 Since the experiment only reproduced the initial stages of symbiogenesis, parallels between  
177 experimental and natural adaptation should be most striking at the branch bLCA<sup>Ct</sup>, *i.e.*, during  
178 the onset of natural evolution towards symbiosis. The evolution experiment showed transient  
179 hypermutagenesis caused by the expression of the *imuA2B2C2* plasmid cassette *ex planta*<sup>19</sup>.  
180 The long timespan since the acquisition of the plasmid precluded the analysis of accelerated  
181 evolution in the branch bLCA<sup>Ct</sup> (relative to others). Yet, we were able to identify the  
182 *imuA2B2C2* cassette in most extant strains, suggesting that they could have played a role in  
183 the symbiotic evolution of *Cupriavidus*. We then searched for genes with an excess of  
184 recombination or nucleotide diversity in the branch bLCA<sup>Ct</sup>, which revealed 90 recombining  
185 genes and 67 genes with an excess of genetic diversity in this branch relative to the *C.*  
186 *taiwanensis* sub-tree (Fig. S3 and Table S3). To identify the parallels between the  
187 experimental and natural processes, we identified the 2372 orthologs between the *R.*  
188 *solanacearum* and *C. taiwanensis* (Table S6), and added the 514 pRALTA genes in the  
189 chimera as orthologs. Clones of the evolution experiment accumulated significantly more  
190 mutations in genes whose orthologs had an excess of polymorphism at the onset of symbiosis  
191 in natural populations (P<0.001, Fisher's test; Tables S7 and S8), revealing a first parallel  
192 between the natural and experimental processes. A second parallel was identified in the  
193 overall regimes of natural selection. Both the substitutions in the core genes of *C. taiwanensis*  
194 (Fig. S4), and the mutations observed in the experiment<sup>15</sup> showed an excess of synonymous  
195 changes relative to the expected ones given the number of non-synonymous mutations. This  
196 shows a predominance of purifying selection in both processes, in spite of the observed  
197 adaptation towards symbiosis.

### 198 **Adaptation in the genetic background, not in the symbiotic plasmid**

199 The symbiotic plasmids carry many genes and induce a profound change in the lifestyle of the  
200 bacteria. We thus expected to identify changes in the plasmid reflecting its accommodation to  
201 the novel genetic background. The plasmid pRalta<sup>LMG19424</sup> accumulated an excess of  
202 synonymous substitutions and a vast majority of the genetic deletions observed in the  
203 experiment (Fig. 3 and Table S9). Natural populations also showed more deletions in the  
204 plasmid, since from the 413 genes present in pRalta<sup>LMG19424</sup> and inferred to be present in  
205 LCA<sup>Ct</sup> only 12% were in the core genome, which is 6 times less than found among the

206 chromosomal genes present in *C. taiwanensis* LMG19424 and inferred to be present in LCA<sup>Ct</sup>  
 207 ( $p < 0.001$ , Fisher's exact test, Fig. 3B). The few pRalta<sup>LMG19424</sup> core genes are related to the  
 208 symbiosis or to typical plasmid functions (conjugation) (Fig. 3). The rate of recombination  
 209 could not be measured on the genomes from the experiments because it is undetectable at this  
 210 level of sequence similarity between clones (which presumably makes it less important as  
 211 driver of diversification). The few plasmid core genes show lower recombination rates (PHI  
 212 and SH analyses, both  $p < 0.01$ ) than the chromosomal ones.

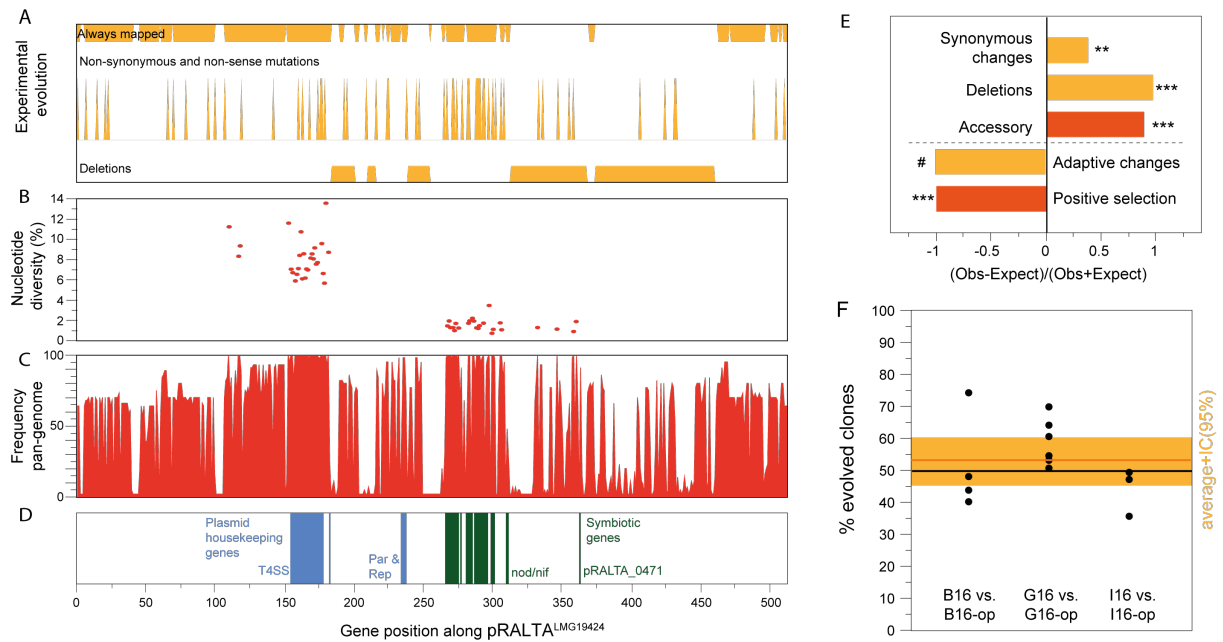

213  
 214 **Figure 3. Analysis of the symbiotic plasmid of *Cupriavidus taiwanensis* LMG19424.** **A.**  
 215 Deletions, non-synonymous and non-sense mutations, and regions of the plasmid that could  
 216 always be mapped to identify mutations in the experiment **B.** Nucleotide diversity of natural *C.*  
 217 *taiwanensis* core genes: symbiotic genes accumulated much less diversity than the other genes.  
 218 **C.** Frequency of each gene in the 44 *C. taiwanensis* (positional orthologs). **D.** Symbiotic and  
 219 plasmid housekeeping genes. **E.** Observed over expected values for a number of traits in the  
 220 plasmid natural (red) or experimental (orange) evolution (Tables S1, S3, and S8). \*\*/\*\*  
 221 significantly different from 1 ( $P < 0.01/0.001$ , Fisher's exact tests for all but the test for  
 222 "Synonymous changes" which was made by permutations, see Methods and Table S9). # We  
 223 could not find a single adaptive mutation in the plasmid in our previous works neither in the  
 224 experiments in panel F. **F.** Impact of pRalta mutations on the *in planta* fitness of evolved  
 225 clones. *M. pudica* plantlets were co-inoculated with pairs of strains at a 1:1 ratio and nodules  
 226 were harvested at 21 dpi for bacteria counting. Each pair consisted of an evolved clone (B16,  
 227 G16 or I16) and the same clone with the evolved pRalta replaced by the original one (B16-op,  
 228 G16-op or I16-op). The orange horizontal bar represents the average and the large orange

229 rectangle the 95% interval of confidence of the average (that includes the value 50% indicating  
230 that the two types of clones are not significantly different in terms of fitness).

231 To evaluate whether the observed rapid plasmid diversification was driving the adaptation to  
232 symbiosis *in natura*, we compared the rates of positive selection on plasmid and  
233 chromosomal genes in *C. taiwanensis*. We identified 325 genes under positive selection in the  
234 clade, and 46 specifically in the branch leading to LCA<sup>Ct</sup> (analysis of 1869 and 1676 core  
235 genes lacking evidence of recombination using PHI, respectively, Table S3). Surprisingly, all  
236 325 genes under positive selection were chromosomal (none was found among the core genes  
237 of the plasmid, Fig. 3E). In parallel, all mutations previously identified as adaptive in the  
238 evolution experiment were chromosomal<sup>13,17,18</sup>. Since our previous analyses of mutations  
239 identified in the evolution experiment only focused on strongly adaptive genes, we evaluated  
240 the impact of pRalta<sup>LMG19424</sup> mutations on the symbiotic evolution of *R. solanacearum* by  
241 replacing the evolved plasmid with the original pRalta<sup>LMG19424</sup> in three evolved clones (B16,  
242 G16 and I16, thus generating strains B16-op, G16-op and I16-op, respectively). The relative  
243 *in planta* fitness of the new chimeras harboring the original plasmid were not significantly  
244 different from that of the experimentally evolved clones (Fig. 3F), showing that the adaptation  
245 of these strains did not involve mutations in the plasmid. Importantly, the original chimera  
246 had similar survival rates with and without the plasmid, suggesting that presence of the  
247 plasmid does not impact bacterial fitness in this respect (Tables S10 and S11). Although we  
248 cannot exclude that some events of positive selection in the plasmid may have passed  
249 undetected, nor that further symbiotic evolution of *R. solanacearum* will involve plasmid  
250 mutations, it appears that the genetic changes leading to improvement of the symbiotic traits  
251 mainly occurred in the chromosomes of *R. solanacearum* in the experiment, and of *C.*  
252 *taiwanensis* in nature, not on the plasmid carrying the symbiotic traits.

### 253 **Parallel co-option of regulatory circuits**

254 We identified 436 genes with non-synonymous or non-sense mutations in the experiment  
255 (Table S12). This set of genes over-represented virulence factors of *R. solanacearum*,  
256 including the T3SS effectors, EPS production, and a set of genes regulating (*phcBQS*) or  
257 directly regulated (*prhI*, *hrpG*, and *xpsR*) by the central regulator PhcA of the cell density  
258 system that controls virulence and pathogenicity in *R. solanacearum*<sup>23</sup> (Fig. 4A and Table  
259 S13). Among them, mutations in the structural T3SS component *hrcV*, or in the virulence

260 regulators *hrpG*, *prhI*, *vsrA*, and *efpR*, were demonstrated to be responsible for the acquisition  
 261 or the drastic improvement of nodulation and/or infection<sup>13,17,18</sup>.

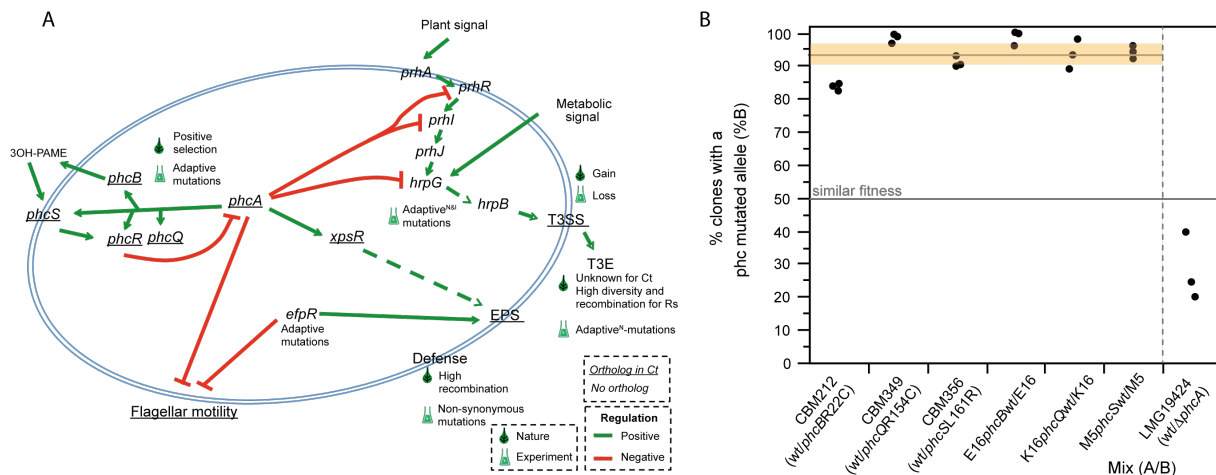

262  
 263 **Figure 4. Virulence factors and regulatory pathways of *R. solanacearum* and their**  
 264 **evolution in the evolution experiment.** A. Schema of the major virulence factors and  
 265 regulatory pathways mentioned in this study and their role in *R. solanacearum* (adapted from  
 266 <sup>23</sup>). Adaptive<sup>N</sup> and adaptive<sup>I</sup>, represent the presence of adaptive mutations for nodulation and  
 267 infection, respectively. Underline, genes or factors present in *C. taiwanensis*. The results of the  
 268 enrichment analyses are in Tables S4, S13 and S21. B. Adaptive nature of the *phc* alleles  
 269 evolved in the experiments and the recruitment of PhcA for symbiosis in the natural symbiont  
 270 *C. taiwanensis* LMG19424. The horizontal grey line represents the average fitness of the  
 271 evolved *phc* genes relative to the wild-type. The horizontal orange rectangle indicates the 95%  
 272 interval of confidence for the mean. The results for *phc* are significantly different from the  
 273 expected under the hypothesis that both variants are equally fit (horizontal line at 50%,  $p <$   
 274 0.005, Wilcoxon test). The mean for the analysis of the mutant of PhcA (25%) is smaller than  
 275 50%, although the difference is at the edge of statistical significance ( $p=0.0597$ , two-side  $t$ -  
 276 student test). The codes of the clones correspond to those indicated in Fig. 1.

277 We first turned our attention to the T3SS because its inactivation was required to activate  
 278 symbiosis in the evolution experiment, presumably because some T3SS effectors block  
 279 nodulation and early infection<sup>13</sup>. In contrast, the emergence of legume symbiosis *in natura*  
 280 seems to be associated with the acquisition of T3SS since all rhizobial *Cupriavidus* strains of  
 281 our sample encode a (chromosomal) T3SS, while most of the other *Cupriavidus* strains do not  
 282 (Fig. 2). This apparent contradiction is solved by the fact that we could not find a single  
 283 ortholog of the 77 T3SS effectors of *R. solanacearum* GMI1000 in *C. taiwanensis*  
 284 LMG19424. Actually, it has been shown that a functional T3SS is not required for mutualistic

285 symbiosis of the latter with *M. pudica*<sup>24</sup>, the only plant species used in the evolution  
286 experiment.

287 We then focused on PhcA-associated genes since they accumulated an excess of mutations in  
288 the experiment (Table S13). The *phc* system, which was only found intact in *Cupriavidus* and  
289 *Ralstonia* (Table S14), regulates a reversible switch between two different physiological  
290 states via the repression of the central regulator PhcA in *Ralstonia*<sup>23</sup> and *Cupriavidus*<sup>25</sup>.  
291 Interestingly, PhcA-associated genes were also enriched in substitutions *in natura*. Indeed, the  
292 *phcBQRS* genes of the cell density-sensing system were among the 67 genes that exhibited an  
293 excess of nucleotide diversity in the branch bLCA<sup>Ct</sup> relative to *C. taiwanensis* ("phcA-linked"  
294 in Table S4). Strikingly, only seven genes showing an excess of diversity at bLCA<sup>Ct</sup> had  
295 orthologs with mutations in the evolution experiment. Among these seven, only two also  
296 showed signature of positive selection in *C. taiwanensis*: *phcB* and *phcS* (ongoing events,  
297 Table S3).

298 Given the parallels between experimental and natural evolution regarding an over-  
299 representation of changes in PhcA-associated genes, we enquired on the possibility that  
300 mutations in the *phcB*, *phcQ* and *phcS* genes, detected in the evolved E16, K16 and M16  
301 clones capable of nodule cell infection were adaptive for symbiosis with *M. pudica*. For this,  
302 we introduced the mutated alleles of these genes in their respective nodulating ancestors,  
303 CBM212, CBM349 and CBM356, and the wild-type allele in the evolved clones E16, K16  
304 and M5 (M5 was used instead of M16, since genetic transformation failed in the latter clone  
305 in spite of many trials). Competition experiments between the pairs of clones harboring the  
306 wild type or the mutant alleles confirmed that these mutations were adaptive (Fig. 4B). The  
307 evolved clones also showed better infectivity, since they contained more bacteria per nodule  
308 (Fig. S5). On the other hand, we found that the Phc system plays a role in the natural *C.*  
309 *taiwanensis*-*M. pudica* symbiosis: a *phcA* deletion mutant had lower nodulation  
310 competitiveness than the wild-type *C. taiwanensis* (Fig. 4B), and lower infectiveness (Fig.  
311 S6), when both strains were co-inoculated to *M. pudica*. Hence, the re-wiring of the *phc*  
312 virulence regulatory pathway of *R. solanacearum* was involved in the evolution of symbiosis  
313 in several lineages of the experimental evolution. In parallel, high genetic diversification  
314 accompanied by positive selection of the homologous pathway was associated with the  
315 transition to symbiosis in the natural evolution of *C. taiwanensis*.

316

## 317 Discussion

318 Years of comparative genomics and loss of function approaches led to propose that most  
319 legume symbionts evolved in two-steps<sup>8</sup>, *i. e.* acquisition of a set of essential symbiotic genes  
320 followed by subsequent adaptation of the resulting genome under plant selection pressure.  
321 Although, this evolutionary scenario has recently been validated in the laboratory<sup>13,17</sup>, to  
322 which extent experimental evolution of symbionts parallels natural symbiogenesis was still  
323 unknown. Here, we highlighted several parallels between the experimental and *in natura*  
324 transitions towards legume symbiosis (Fig. 5). Such parallels were not necessarily expected,  
325 because the two processes differed in a number of fundamental points. The two species are  
326 from different genera and had different original lifestyles, saprophytic for *C. taiwanensis* and  
327 pathogenic for *R. solanacearum*. The conditions of the experimental evolution were  
328 extremely simplified and controlled, whereas natural environmental conditions were certainly  
329 very complex and changing. The time span of both processes was radically different, 12-16  
330 MYA in nature, and ca. 400 bacterial generations per lineage in the experiment, providing  
331 very different magnitudes of genetic diversity. This precluded the identification of  
332 parallelisms at the scale of nucleotide positions due to excessive diversity in natural  
333 populations. Lastly, *C. taiwanensis* are well-adapted mutualistic symbionts of *Mimosa* spp.,  
334 whereas the lab-evolution of *Ralstonia* is not yet achieved, none of the evolved clones being  
335 able to persist within nodule cells and fix nitrogen to the benefit of the plant.

336 The plasmid carrying the essential *nod* and *nif* genes drove the transition towards symbiosis in  
337 both processes. We expected that plasmid genes would show evidence of adaptation, either at  
338 the level of gene expression regulation or biochemical fine-tuning, to the novel genetic  
339 background and environmental conditions. Instead, the abundant substitutions observed in the  
340 plasmid seem to have a negligible role in the experiment and lack evidence of positive  
341 selection in nature. The cost of the plasmid has also not changed during the experiment. This  
342 suggests that the symbiotic genes acquired by *C. taiwanensis* in nature were already - like in  
343 the experiment - pre-adapted to establish a symbiotic association with *Mimosa* species. It is in  
344 agreement with proposals that pRalta was acquired from *Burkholderia*<sup>26</sup>, which are ancient  
345 symbionts of *Mimosa* spp.<sup>27</sup>. This also suggests that adaptation following the acquisition of a  
346 large plasmid encoding traits driving ecological shifts does not require plasmid evolution. The  
347 fact that genetic adaptation to this novel complex trait only occurred in the background is a

348 testimony of the ability of mobile genetic elements to seamlessly plug novel functions in their  
 349 hosts.

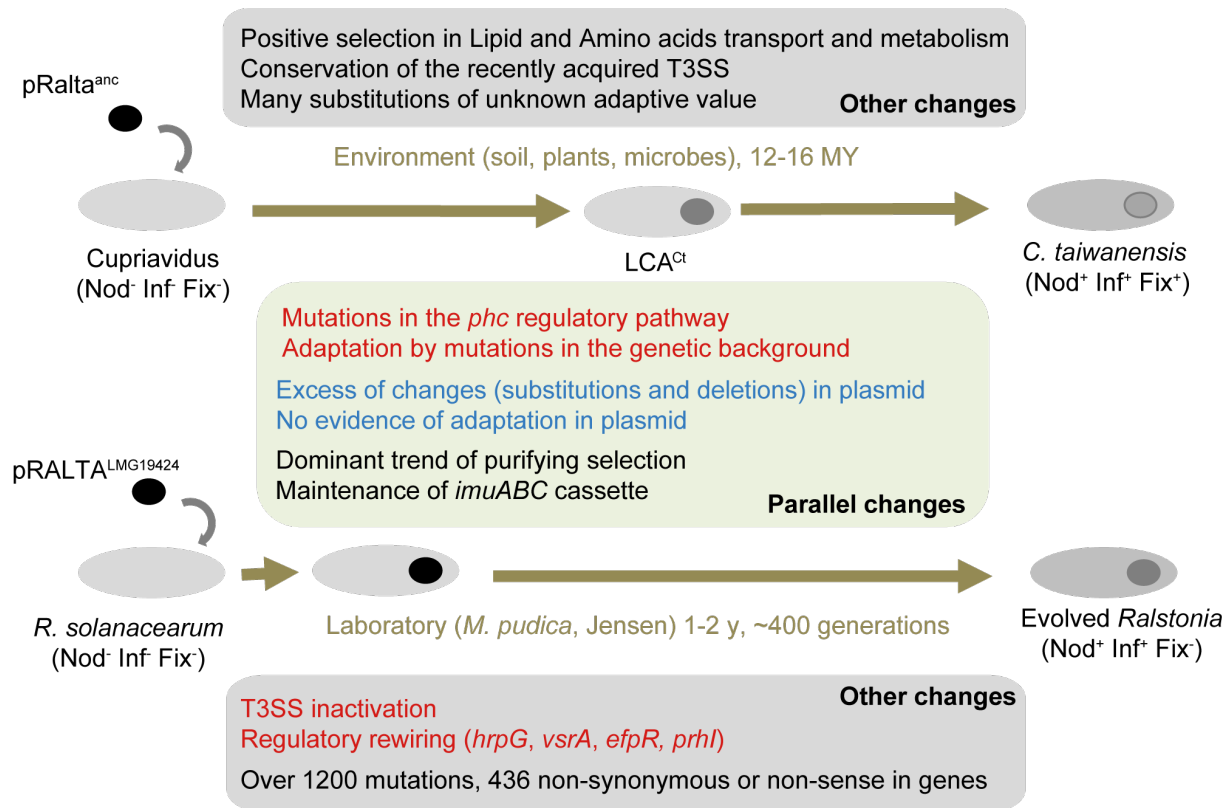

350

351 **Figure 5. Overall similarities and differences between the experimental and natural**  
 352 **evolutionary processes described in this study.** Adaptive and non-adaptive changes are in  
 353 orange and blue, respectively.

354 Instead of affecting directly the novel genetic information, adaptive mutations seem to have  
 355 centered on the rewiring of regulatory modules to inactivate or co-opt native functions for the  
 356 novel trait. We previously showed that loss of the ability to express the T3SS was strictly  
 357 necessary for the early transition towards symbiosis in the experiment<sup>13</sup>, and that subsequent  
 358 adaptation favored the re-use of regulatory modules leading to massive metabolic and  
 359 transcriptomic changes<sup>17</sup>. These phenotypic shifts occurred via mutations targeting regulatory  
 360 genes specific to *Ralstonia* (e.g., *hrpG*, *prhI*, *efpR*, Rsc0965), which finely control the  
 361 expression of many virulence determinants<sup>23,28,29</sup>. Here, from the analysis of orthologs  
 362 between *R. solanacearum* and *C. taiwanensis*, we showed that several genes in the *phcBQRS*  
 363 operon both exhibited significant positive selection in *C. taiwanensis* populations and  
 364 accumulated adaptive mutations in the evolution experiment. In *R. solanacearum*, these genes  
 365 control the activity of the global virulence regulator PhcA via a cell density-dependent  
 366 mechanism<sup>30</sup>. Mutations in these genetic regulators are unlikely to cause adaptation by

367 attenuating the virulence of *Ralstonia*, since the chimeric ancestor is not pathogenic on *M.*  
368 *pudica* (and these mutations induced the loss of pathogenicity on *Arabidopsis thaliana*<sup>18</sup>).  
369 Since PhcA also plays a role in the natural *C. taiwanensis*-*M. pudica* symbiosis, we speculate  
370 that adaptive mutations in the experiment and high diversification in nature on *phc* genes after  
371 the acquisition of pRalta may reflect the re-wiring of a quorum-sensing system to sense the  
372 environment for cues of when to express the novel mutualistic dialogue with eukaryotes.  
373 Further work should determine if some of these mutations resulted in the integration of the  
374 gene expression network of the plasmid in the broader network of the cell.

375 Very controlled experimental evolution studies show few similar parallel mutations between  
376 replicates and require higher-order analyses at the level of genes, operons or pathways to  
377 identify commonalities<sup>31</sup>. Here, the comparison of the natural evolution of *Mimosa* symbionts  
378 in the *Cupriavidus* genus and the experimental symbiotic evolution of *Ralstonia* under *M.*  
379 *pudica* selection pressure could not reveal parallel changes at the nucleotide level because of  
380 the high diversity of natural populations. Yet, it showed that symbiotic adaptation occurred in  
381 the recipient genome, with similar population genetic patterns, and involved changes in an  
382 homologous central regulatory pathway in both processes. These parallels highlight the  
383 potential of research projects integrating population genomics, molecular genetics, and  
384 evolution experiment to provide insights on adaptation in nature and in the laboratory.  
385 Therefore, experimental evolution appears not only useful to demonstrate the biological  
386 plausibility of theoretical models in evolutionary biology, but also to enlighten the natural  
387 history of complex adaptation processes.

388



## 389 **Methods**

390 **Dataset for the experimental evolution.** We used previously published data on the genomic  
391 changes observed in the experimental evolution of the chimera, including 21 bacterial clones  
392 (three ancestors and 18 evolved clones)<sup>15</sup>. We analyzed all the synonymous and non-  
393 synonymous mutations of each clone from these datasets (Table S12). Large deletions above  
394 1 kb were first listed based on the absence of Illumina reads in these regions, and were then  
395 validated by PCR amplification using specific primers listed in Table S15. Primers were  
396 designed to amplify either one or several small fragments of the putative deleted regions or  
397 the junction of these deletions. All primer pairs were tested on all ancestors and final clones  
398 (Table S1).

399 **Mutant construction.** The pRalta in evolved *Ralstonia* clones B16, G16 and I16 or their  
400 derivatives, was replaced by the wild-type pRalta of *C. taiwanensis* LMG19424 strain as  
401 previously described<sup>15</sup>, generating B16-op, G16-op and I16-op. Wild-type alleles of the  
402 *phcB*, *phcQ* and *phcS* genes and constitutively expressed reporter genes (GFP, mCherry) were  
403 introduced into *Ralstonia* evolved clones using the MuGent technique<sup>32</sup>. Briefly, this  
404 technique consisted in the co-transformation of two DNA fragments, one fragment carrying a  
405 kanamycin resistance cassette together with a gene coding a fluorophore and one unlabelled  
406 PCR fragment of *ca.* 6 kb carrying the point mutation to introduce, as previously described<sup>17</sup>.  
407 Co-transformants were first selected on kanamycin, then screened by PCR for the presence of  
408 the point mutation. M5, which possesses the *phcS* mutation, was used instead of M16 since  
409 M16 is no more transformable.

410 To construct the *phcA* deletion mutant of LMG19424, we used the pGPI-SceI/pDAI-SceI  
411 technique previously described<sup>33</sup>. Briefly the regions upstream and downstream *phcA* were  
412 amplified with the oCBM3413-3414 and oCBM3415-3416 primer pairs and the Phusion  
413 DNA polymerase (Thermo Fisher scientific). The two PCR products were digested with *Xba*I-  
414 *Bam*HI and *Bam*HI-*Eco*RI respectively and cloned into the pGPI-SceI plasmid digested by  
415 *Xba*I and *Eco*RI. The resulting plasmid was introduced into LMG19424 by triparental mating  
416 using the pRK2013 as helper plasmid. Deletion mutant were obtained after introduction of the  
417 pDAI-SceI plasmid encoding the I-SceI nuclease. LMG19424 *phcA* deletion mutants were  
418 verified by PCR using the oCBM3417-3418 and oCBM3419-3420 primer pairs  
419 corresponding to external and internal regions of *phcA*, respectively. Oligonucleotides used in  
420 these constructions are listed in Table S16.

421 **Relative *in planta* fitness.** *Mimosa pudica* seeds from Australia origin (B&T World Seed,  
422 Paguignan, France) were cultivated as previously described <sup>15</sup>. To measure the *in planta*  
423 relative fitness, a mix of two strains bearing different antibiotic resistance genes or  
424 fluorophores ( $5 \cdot 10^5$  bacteria of each strain per plant) were inoculated to 20 plants. Nodules  
425 were harvested 21 days after inoculation, pooled, surface sterilized and crushed. Dilutions of  
426 nodule crushes were spread on selective plates, incubated two days at 28°C, then colonies  
427 were counted using a fluorescent stereo zoom microscope V16 (Zeiss) when needed. Three  
428 independent experiments were performed for each competition.

429 **Public genome dataset.** We collected 13 genomes of *Cupriavidus* spp. (including three  
430 rhizobia) and 31 of *Ralstonia* from GenBank RefSeq and the MicroScope platform  
431 (<http://www.genoscope.cns.fr/agc/microscope/home/>) as available in September 2015. We  
432 removed the genomes that seemed incomplete or of poor quality, notably those smaller than 5  
433 Mb and with L90>150 (defined as the smallest number of contigs whose cumulated length  
434 accounts for 90 % of the genome). All accession numbers are given in Table S17. Genomes of  
435  $\alpha$ - and  $\beta$ -Proteobacteria larger than 1 Mb and genomes of phages were downloaded from  
436 GenBank RefSeq as available in February 2013.

437 **Sequencing, assembly, and annotation of Illumina data.** The genomes of 43 *Mimosa* spp.  
438 isolates, a non rhizobial strain of *Cupriavidus* (strain LMG19464) as well as a *C. oxalaticus*  
439 strain (LMG2235) (Table S17), were sequenced at the GeT-PlaGe core facility, INRA  
440 Toulouse ([get.genotoul.fr](http://get.genotoul.fr)). DNA-seq libraries were prepared according to Biooscientific's  
441 protocol using the Biooscientific PCR free Library Prep Kit. Briefly, DNA was fragmented by  
442 sonication, size selection was performed using CLEANNA CleanPCR beads and adaptators  
443 were ligated to be sequenced. Library quality was assessed using an Advanced Analytical  
444 Fragment Analyser and libraries were quantified by qPCR using the Kapa Library  
445 Quantification Kit. DNA-seq experiments were performed on an Illumina HiSeq2000  
446 sequencer using a paired-end read length of 2 x 100 bp with the HiSeq v3 reagent kit  
447 (LMG2235 and LMG19431) or on an Illumina MiSeq sequencer using a paired-end read  
448 length of 2 x 300 pb with the Illumina MiSeq v3 reagent kit (other strains). On average,  
449 genomes contained 99 contigs and an L90 of 29.

450 Genome assemblies were performed with the AMALGAM assembly pipeline (Automated  
451 MicrobiAL Genome Assembler; Cruveiller S. and Séjourné M., unpublished). The pipeline is  
452 a python script (v2.7.x and onward) that launches the various parts of the analysis and checks

453 that all tasks are completed without error. To date AMALGAM embeds SPAdes, ABySS<sup>34</sup>,  
454 IDBA-UD<sup>35</sup>, Canu<sup>36</sup>, and Newbler<sup>37</sup>. After the assembly step, an attempt to fill  
455 scaffolds/contigs gaps is performed using the gapcloser software from the SOAPdenovo2  
456 package<sup>38</sup>. Only one gap filling round was performed since launching gapcloser iteratively  
457 may lead to an over-correction of the final assembly. AMALGAM ends with the generation  
458 of a scaffolds/contigs file (fasta format) and a file describing the assembly in agp format  
459 (v2.0).

460 The genomes were subsequently processed by the MicroScope pipeline for complete  
461 structural and functional annotation<sup>39</sup>. Gene prediction was performed using the AMIGene  
462 software<sup>40</sup> and the microbial gene finding program Prodigal<sup>41</sup> known for its capability to  
463 locate the translation initiation site with great accuracy. The RNAmmer<sup>42</sup> and tRNAscan-SE  
464<sup>43</sup> programs were used to predict rRNA and tRNA-encoding genes, respectively. Genome  
465 sequence and annotation was made publicly available (see accession numbers in Table S17).

466 **PacBio sequencing.** Library preparation and sequencing were performed according to the  
467 manufacturer's instructions "Shared protocol-20kb Template Preparation Using BluePippin  
468 Size Selection system (15kb-size cutoff)". At each step DNA was quantified using the Qubit  
469 dsDNA HS Assay Kit (Life Technologies). DNA purity was tested using the nanodrop  
470 (Thermofisher) and size distribution and degradation assessed using the Fragment analyzer  
471 (AATI) High Sensitivity DNA Fragment Analysis Kit. Purification steps were performed  
472 using 0.45X AMPure PB beads (Pacbio). 10µg of DNA was purified then sheared at 40kb  
473 using the meraruptor system (diagenode). A DNA and END damage repair step was  
474 performed on 5µg of sample. Then blunt hairpin adapters were ligated to the library. The  
475 library was treated with an exonuclease cocktail to digest unligated DNA fragments. A size  
476 selection step using a 13-15kb cutoff was performed on the BluePippin Size Selection system  
477 (Sage Science) with the 0.75% agarose cassettes, Marker S1 high Pass 15-20kb.

478 Conditioned Sequencing Primer V2 was annealed to the size-selected SMRTbell. The  
479 annealed library was then bound to the P6-C4 polymerase using a ratio of polymerase to  
480 SMRTbell at 10:1. Then after a magnetic bead-loading step (OCPW), SMRTbell libraries  
481 were sequenced on RSII instrument at 0.2nM with a 360 min movie. One SMRTcell was used  
482 for sequencing each library. Sequencing results were validated and provided by the Integrated  
483 next generation sequencing storage and processing environment NG6 accessible in the  
484 genomic core facility website<sup>44</sup>.

485 **Core genomes.** Core genomes were computed using reciprocal best hits (hereafter named  
486 RBH), using end-gap free Needleman-Wunsch global alignment, between the proteome of *C.*  
487 *taiwanensis* LMG19424 or *R. solanacearum* GMI1000 (when the previous was not in the sub-  
488 clade) as a pivot (indicated by \*\* on Fig. S1A) and each of the other 88 proteomes<sup>45</sup>. Hits  
489 with less than 40 % similarity in amino acid sequence or more than a third of difference in  
490 protein length were discarded. The lists of orthologs were filtered using positional  
491 information. Positional orthologs were defined as RBH adjacent to at least two other pairs of  
492 RBH within a neighbourhood of ten genes (five up- and five down-stream). We made several  
493 sets of core genomes (see Fig. S1A): all the 89 strains (A1), 44 *C. taiwanensis* (Ct), Ct with  
494 the closest outgroup (C2), Ct with the five closest outgroups (C3), the whole 60 genomes of  
495 the genus *Cupriavidus* (Cg), and the 14 genomes of *R. solanacearum* (Rs). They were defined  
496 as the intersection of the lists of positional orthologs between the relevant pairs of genomes  
497 and the pivot (Table S18).

498 **Pan genomes.** Pan genomes describe the full complement of genes in a clade and were  
499 computed by clustering homologous proteins in gene families. Putative homologs between  
500 pairs of genomes were determined with blastp v2.2.18 (80 % coverage), and e-values (if  
501 smaller than  $10^{-4}$ ) were used to infer protein families using SiLiX (v1.2.8, [http://lbbe.univ-](http://lbbe.univ-lyon1.fr/SiLiX)  
502 [lyon1.fr/SiLiX](http://lbbe.univ-lyon1.fr/SiLiX))<sup>46</sup>. To decrease the number of paralogs in pan genomes, we defined a minimal  
503 identity threshold between homologs for each set. For this, we built the distribution of  
504 identities for the positional orthologs of core genomes between the pivot and the most distant  
505 genome in the set (Fig. S7), and defined an appropriate threshold in order to include nearly all  
506 core genes but few paralogs (Table S19).

507 **Alignment and phylogenetic analyses.** Multiple alignments were performed on protein  
508 sequences using Muscle v3.8.31<sup>47</sup>, and back-translated to DNA. We analyzed how the  
509 concatenated alignment of core genes fitted different models of protein or DNA evolution  
510 using IQ-TREE v1.3.8<sup>48</sup>. The best model was determined using the Bayesian information  
511 criterion (BIC). Maximum likelihood trees were then computed with IQ-TREE v1.3.8 using  
512 the appropriate model, and validated via a ultrafast bootstrap procedure with 1000 replicates  
513<sup>49</sup> (Table S18). The maximum likelihood trees of each set of core genes were computed with  
514 IQ-TREE v1.3.8 using the best model obtained for the concatenated multiple alignment.

515 In order to root the phylogeny based on core genes, we first built a tree using 16S rRNA  
516 sequences of the genomes of *Ralstonia* and *Cupriavidus* genera analysed in this study and of

517 ten outgroup genomes of  $\beta$ -Proteobacteria. For this, we made a multiple alignment of the 16S  
518 sequences with INFERNAL v.1.1 (with default parameter)<sup>50</sup> using RF00177 Rfam model  
519 (v.12.1)<sup>51</sup>, followed by manual correction with SEAVIEW to removed poorly aligned  
520 regions. The tree was computed by maximum likelihood with IQ-TREE using the best model  
521 (GTR+I+G4), and validated via an ultrafast bootstrap procedure with 1000 replicates.

522 To date the acquisition of the symbiotic plasmid in the branch bLCA<sup>Ct</sup>, we computed the  
523 distances in the 16S rDNA tree between each strain and each of the nodes delimitating the  
524 branch bLCA<sup>Ct</sup> (respectively LCA<sup>Ct</sup> and C2 in Fig. 2). The substitution rate of 16S in  
525 enterobacteria was estimated at ~1% per 50 MY of divergence<sup>52</sup>, and we used this value as a  
526 reference.

527 **Orthologs and pseudogenes of symbiotic genes, the mutagenic cassette, T3SS and**  
528 **PhcABQRS.** We identified the positional orthologs of Cg for symbiotic genes, the mutagenic  
529 cassette, T3SS, and PhcABQRS using RBH and *C. taiwanensis* LMG19424 as a pivot (such  
530 as defined above). These analyses identify *bona fide* orthologs in most cases (especially  
531 within species), and provide a solid basis for phylogenetic analyses. However, they may miss  
532 genes that evolve fast, change location following genome rearrangements, or that are affected  
533 by sequence assembling (incomplete genes, small contigs without gene context, etc.). They  
534 also miss pseudogenes. Hence, we used a complementary approach to analyze in detail the  
535 genes of the symbiotic island in the plasmid, the mutagenic cassette, T3SS and PhcABQRS.  
536 Indeed, we searched for homologs of each gene in the reference genome in the other genomes  
537 using LAST v744<sup>53</sup> and a score penalty of 15 for frameshifts. We discarded hits with evalues  
538 below  $10^{-5}$ , with less than 40 % similarity in sequence, or aligning less than 50 % of the  
539 query. In order to remove most paralogs, we plotted values of similarity and patristic  
540 distances between the 59 *Cupriavidus* and the reference strain *C. taiwanensis* LMG19424 for  
541 each gene. We then manually refined the annotation using this analysis.

542 **Evolution of gene families.** We used Count (version downloaded in December 2015)<sup>54</sup> to  
543 study the past history of transfer, loss and duplication of the protein families of the pan  
544 genomes. The analysis was done using the core genomes reference phylogenies. We tested  
545 different models of gene content evolution using the tree of Cg (Table S18), and selected the  
546 best model using the Akaike information criterion (AIC) (Table S19). We computed the  
547 posterior probabilities for the state of the gene family repertoire at inner nodes with maximum  
548 likelihood and used a probability cutoff of 0.5 to infer the dynamics of gene families, notably

549 presence, gain, loss, reduction, and expansion for the branch leading to the last common  
550 ancestor (LCA) of *C. taiwanensis* (LCA<sup>Ct</sup>).

551 **Measures of similarity between genomes.** For each pair of genomes, we computed two  
552 measures of similarity, one based on gene repertoires and another based on the sequence  
553 similarity between two genomes. The gene repertoire relatedness (GRR) was computed as the  
554 number of positional orthologs shared by two genomes divided by the number of genes in the  
555 smallest one<sup>55</sup>. Pairwise average nucleotide identities (ANIb) were calculated using the pyani  
556 Python3 module (<https://github.com/widdowquinn/pyani>), with default parameters<sup>56</sup>. We  
557 used single-linkage clustering to group strains likely to belong to the same species. This was  
558 done constructing a transitive closure of sequences with an ANIb higher than a particular  
559 threshold (*i.e.*, >94%, 95% or 96%). We used BioLayout Express<sup>3D</sup> to visualize the graphs  
560 representing the ANIb relationships and the resulting groups for each threshold (Fig. S8).

561 **Inference of recombination.** We identified recombination events using three different  
562 approaches. We used the pairwise homoplasy index (PHI) test to look for incongruence  
563 within each core gene multiple alignment (Ct and C3 datasets). We made 10,000 permutations  
564 to assess the statistical significance of the results<sup>57</sup>. We used the SH-test, as implemented in  
565 IQ-TREE v1.3.8<sup>48</sup> (GTR+I+G4 model, 1000 RELL replicates), to identify incongruence  
566 between the trees of each core gene and the concatenated multiple alignment of all core genes.  
567 We used ClonalFrameML v10.7.5<sup>58</sup> to infer recombination and mutational events in the  
568 branch leading to the LCA<sup>Ct</sup> using the phylogenetic tree of C3 (Table S18). The  
569 transition/transversion ratios given as a parameter to ClonalFrameML were estimated with the  
570 R package PopGenome v2.1.6<sup>59</sup>. Lastly, ClonalFrameML was also used to compare the  
571 relative frequency of recombination and mutation on the whole concatenated alignments of Ct  
572 and Rs.

573 **Molecular diversity and adaptation.** Positive selection was identified using likelihood ratio  
574 tests by comparing the M7 (beta) - M8 (beta& $\omega$ ) models of codeml using PAML v4.8<sup>60</sup>. We  
575 used the independent phylogenetic tree of each gene family to avoid problems associated with  
576 horizontal transfer (since many genes failed the SH-test for congruence with the core genome  
577 phylogenetic tree). We removed from the analysis gene families that had incongruent  
578 phylogenetic signals within the multiple alignment<sup>61</sup>. These correspond to the families for  
579 which PHI identified evidence of recombination ( $p < 0.05$ ).

580 We inferred the mutations arising in the branch leading to LCA<sup>Ct</sup> using the phylogenetic tree  
581 build with the core genome of C3 (Ct and the five closest outgroups). First, we used  
582 ClonalFrameML to reconstruct the ancestral sequences of LCA<sup>Ct</sup> and LCA<sup>C2</sup> (accounting for  
583 recombination). Then, we estimated nucleotide diversity of each core gene for Ct, and  
584 between LCA<sup>Ct</sup> and LCA<sup>C2</sup> using the R package pegas. Finally, we used the branch-site model  
585 of codeml to identify positive selection on this branch for the core genes of C3 that lacked  
586 evidence of intragenic recombination (detected using PHI).

587 To infer the extent of purifying selection for Ct, we computed dN/dS values for each core  
588 genes between *C. taiwanensis* LMG19424 and the others strains of Ct using the yn00 model  
589 of PAML v4.8. We then plotted the average dN/dS of each strains with the patristic distances  
590 obtained from the tree of the concatenated multiple alignment of all core genes.

591 **Functional annotations.** We searched for the functions over-represented relative to a number  
592 of characteristics (recombination, nucleotide diversity, etc.). We analyzed COG categories,  
593 protein localizations, transporters, regulatory proteins and several pre-defined lists of genes of  
594 interest in relation to rhizobial symbiosis and to virulence.

595 We used COGnitor<sup>62</sup> as available on the MicroScope Platform  
596 (<https://www.genoscope.cns.fr/agc/microscope/home/>) to class genes according to the COG  
597 categories (Tables S3 and S8). Protein subcellular localizations were predicted using PSORTb  
598 v3.0.2 (<http://www.psort.org/psortb/>)<sup>63</sup>. Transporters and regulatory proteins were inferred  
599 using TransportDB (<http://www.membranetransport.org/>)<sup>64</sup> and P2RP (<http://www.p2rp.org/>)  
600<sup>65</sup>, respectively. Protein secretion systems were identified using TXSScan  
601 (<http://mobylye.pasteur.fr/cgi-bin/portal.py#forms:txsscan>)<sup>66</sup>. We manually checked and  
602 corrected the lists. Specific annotations were also defined for (i) *R. solanacearum* GMI1000:  
603 Type III effectors<sup>67</sup>, PhcA-associated genes (*i.e.*, genes involved in the upstream regulatory  
604 cascade controlling the expression of phcA, and genes directly controlled by PhcA)<sup>23,68,69</sup>,  
605 virulence<sup>70</sup>, extracellular polysaccharides (EPS)<sup>69,71</sup>, chemotaxis<sup>72</sup>, twin-arginine  
606 translocation pathway (Tat)<sup>73</sup>, Tat-secreted protein<sup>74</sup>, and (ii) the pRalta of *C. taiwanensis*  
607 LMG19424: symbiotic genes<sup>14</sup>, genes pertaining to plasmid biology (conjugation,  
608 replication, partition, based on the annotations<sup>75</sup>), and operons using ProOpDB  
609 (<http://operons.ibt.unam.mx/OperonPredictor/>)<sup>76</sup>. Lastly, we also annotated positional  
610 orthologs between *R. solanacearum* GMI1000 and *C. taiwanensis* LMG19424 according to  
611 specific annotations used for both strains (Tables S3 and S8).

612 **Analysis of the mutations observed in the experimental evolution.** To estimate differences  
613 between mutation rates on the three replicons of the chimera, we compared the observed  
614 number of synonymous mutations in each replicon to those obtained from simulations of  
615 genome evolution. First, we analyzed the distribution of synonymous mutations of the 18  
616 final evolved clones in regions of the genome that were covered by sequencing data (some  
617 regions with repeats cannot be analyzed without ambiguity in the assignment of mutations).  
618 We built the mutation spectrum of the genome using these synonymous mutations, since they  
619 are expected to be the least affected by selection. Second, we performed 999 random  
620 experiments of genome evolution using the mutation spectrum and the total number of  
621 synonymous mutations obtained for the 18 final clones. With the results, we draw the  
622 distributions of the expected number of synonymous mutations in each replicon (under the  
623 null hypothesis that they occurred randomly). This data was then used to define intervals of  
624 confidence around the average values observed in the simulations.

625 **Statistical analyses.** In order to identify genes that evolved faster in the branch leading to  
626  $LCA^{Ct}$ , we compared the nucleotide diversity of sequences for  $LCA^{Ct}$  and  $LCA^{C2}$  with those  
627 of the extant 44 *C. taiwanensis* using a regression analysis. Outliers above the regression line  
628 were identified using a one-sided prediction interval ( $p < 0.001$ ) as implemented in JMP  
629 (JMP<sup>®</sup>, Version 10. SAS Institute Inc., Cary, NC, 1989-2007).

630 We computed functional enrichment analyses to identify categories over-represented in a  
631 focal set relative to a reference dataset. The categories that were used are listed above in the  
632 section *Functional annotations*. To account for the association of certain genes to multiple  
633 functional categories, enrichments were assessed by resampling without replacement the  
634 appropriated reference dataset (see Table S20) to draw out the expected null distribution for  
635 each category. More precisely, we made 999 random samples of the number of genes  
636 obtained for each analysis (positive selection, recombination, etc.) in the reference dataset.  
637 For each category, we then compared the observed value (in the focal set) to the expected  
638 distribution (in the reference dataset) to compute a p-value based on the number of random  
639 samples of the reference dataset that showed higher number of genes from the category.

640 We also compared the nucleotide diversity between sets of genes using the nonparametric  
641 Wilcoxon rank sum test (`{stats}, wilcox.test`).

642 Finally, we computed Fisher's exact tests (R package `{stats}, fisher.test`) to estimate the  
643 association between results of the natural and the experimental evolution, *i.e.*, to test whether



644 mutations found in the experimental evolution targeted genes that were found to be  
645 significantly more diverse in the natural process.

646 P-values were corrected for multiple comparisons using Benjamini and Hochberg's method <sup>77</sup>  
647 (`{stats}`, `p.adjust`).

648 Statistical analyses with R were done using version 3.1.3 (R: a language and environment for  
649 statistical computing, 2008; R Development Core Team, R Foundation for Statistical  
650 Computing, Vienna, Austria [<http://www.R-project.org>]).

651

## 652 **Acknowledgements**

653 This work was supported by funds from the French National research Agency (ANR-12-  
654 ADAP-0014-01 and ANR-16-CE20-0011-01) the "Laboratoire d'Excellence (LABEX)"  
655 TULIP (ANR-10-LABX-41) and France Génomique National infrastructure, funded as part of  
656 "Investissement d'avenir" program managed by Agence Nationale pour la Recherche (contrat  
657 ANR-10-INBS-09).

658 We thank Olaya Rendueles, Rémi Peyraud, Ludovic Cottret, Stéphane Genin, and Pedro  
659 Couto Oliveira for helpful comments and suggestions. We thank Eddy Ngonkeu and Moussa  
660 Diabate for help with the strain collection.

661

## 662 **Contributions**

663 CC, CM, and ER conceived the project, integrated the analyses, and wrote the draft of the  
664 manuscript. CC, MTouchon, and ER made the computational analyses. DC and MTang  
665 performed the experiments and analyzed the data. LM and MAP provided strains and data.  
666 SC assembled and annotated the genomes. All authors contributed to the final text.

667

## 668   **References**

- 669    1. Kawecki, T. J. *et al.* Experimental evolution. *Trends Ecol. Evol.* **27**, 547–560 (2012).
- 670    2. Barrick, J. E. & Lenski, R. E. Genome dynamics during experimental evolution. *Nat. Rev.*  
671       *Genet.* **14**, 827–839 (2013).
- 672    3. Metzger, B. P. H., Yuan, D. C., Gruber, J. D., Dubeau, F. & Wittkopp, P. J. Selection on  
673       noise constrains variation in a eukaryotic promoter. *Nature* **521**, 344–347 (2015).
- 674    4. Maddamsetti, R. *et al.* Synonymous genetic variation in natural isolates of *Escherichia*  
675       *coli* does not predict where synonymous substitutions occur in a long-term experiment.  
676       *Mol. Biol. Evol.* **32**, 2897–2904 (2015).
- 677    5. Bailey, S. F. & Bataillon, T. Can the experimental evolution programme help us elucidate  
678       the genetic basis of adaptation in nature? *Mol. Ecol.* **25**, 203–218 (2016).
- 679    6. Ochman, H. & Moran, N. A. Genes lost and genes found: evolution of bacterial  
680       pathogenesis and symbiosis. *Science* **292**, 1096–1099 (2001).
- 681    7. Lercher, M. J. & Pal, C. Integration of horizontally transferred genes into regulatory  
682       interaction networks takes many million years. *Mol. Biol. Evol.* **25**, 559–567 (2008).
- 683    8. Masson-Boivin, C., Giraud, E., Perret, X. & Batut, J. Establishing nitrogen-fixing  
684       symbiosis with legumes: how many rhizobium recipes? *Trends Microbiol.* **17**, 458–466  
685       (2009).
- 686    9. Sullivan, J. T., Patrick, H. N., Lowther, W. L., Scott, D. B. & Ronson, C. W. Nodulating  
687       strains of *Rhizobium loti* arise through chromosomal symbiotic gene transfer in the  
688       environment. *Proc. Natl. Acad. Sci.* **92**, 8985–8989 (1995).
- 689    10. Moulin, L., Béna, G., Boivin-Masson, C. & Stępkowski, T. Phylogenetic analyses of  
690       symbiotic nodulation genes support vertical and lateral gene co-transfer within the  
691       *Bradyrhizobium* genus. *Mol. Phylogenet. Evol.* **30**, 720–732 (2004).

- 692 11. Nandasena, K. G., O'Hara, G. W., Tiwari, R. P. & Howieson, J. G. Rapid *in situ*  
693 evolution of nodulating strains for *Biserrula pelecinus* L. through lateral transfer of a  
694 symbiosis island from the original mesorhizobial inoculant. *Appl. Environ. Microbiol.* **72**,  
695 7365–7367 (2006).
- 696 12. Remigi, P., Zhu, J., Young, J. P. W. & Masson-Boivin, C. Symbiosis within symbiosis:  
697 evolving nitrogen-fixing legume symbionts. *Trends Microbiol.* **24**, 63–75 (2016).
- 698 13. Marchetti, M. *et al.* Experimental evolution of a plant pathogen into a legume symbiont.  
699 *PLoS Biol.* **8**, e1000280 (2010).
- 700 14. Amadou, C. *et al.* Genome sequence of the -rhizobium *Cupriavidus taiwanensis* and  
701 comparative genomics of rhizobia. *Genome Res.* **18**, 1472–1483 (2008).
- 702 15. Marchetti, M. *et al.* Experimental evolution of rhizobia may lead to either extra- or  
703 intracellular symbiotic adaptation depending on the selection regime. *Mol. Ecol.* **26**,  
704 1818–1831 (2017).
- 705 16. Marchetti, M. *et al.* Shaping bacterial symbiosis with legumes by experimental evolution.  
706 *Mol. Plant. Microbe Interact.* **27**, 956–964 (2014).
- 707 17. Capela, D. *et al.* Recruitment of a lineage-specific virulence regulatory pathway promotes  
708 intracellular infection by a plant pathogen experimentally evolved into a legume  
709 symbiont. *Mol. Biol. Evol.* **34**, 2503–2521 (2017).
- 710 18. Guan, S. H. *et al.* Experimental evolution of nodule intracellular infection in legume  
711 symbionts. *ISME J.* **7**, 1367–1377 (2013).
- 712 19. Remigi, P. *et al.* Transient hypermutagenesis accelerates the evolution of legume  
713 endosymbionts following horizontal gene transfer. *PLoS Biol* **12**, e1001942 (2014).
- 714 20. Klonowska, A. *et al.* Biodiversity of *Mimosa pudica* rhizobial symbionts (*Cupriavidus*  
715 *taiwanensis*, *Rhizobium mesoamericanum*) in New Caledonia and their adaptation to  
716 heavy metal-rich soils. *FEMS Microbiol. Ecol.* **81**, 618–635 (2012).

- 717 21. Chen, W.-M. *et al.* Legume symbiotic nitrogen fixation by beta-proteobacteria is  
718 widespread in nature. *J. Bacteriol.* **185**, 7266–7272 (2003).
- 719 22. Simon, M. F. *et al.* Recent assembly of the Cerrado, a neotropical plant diversity hotspot,  
720 by in situ evolution of adaptations to fire. *Proc. Natl. Acad. Sci.* **106**, 20359–20364  
721 (2009).
- 722 23. Genin, S. & Denny, T. P. Pathogenomics of the *Ralstonia solanacearum* species complex.  
723 *Annu. Rev. Phytopathol.* **50**, 67–89 (2012).
- 724 24. Saad, M. M., Crevecoeur, M., Masson-Boivin, C. & Perret, X. The type 3 protein  
725 secretion system of *Cupriavidus taiwanensis* strain LMG19424 compromises symbiosis  
726 with *Leucaena leucocephala*. *Appl. Environ. Microbiol.* **78**, 7476–7479 (2012).
- 727 25. Garg, R. P. *et al.* Evidence that *Ralstonia eutropha* (*Alcaligenes eutrophus*) contains a  
728 functional homologue of the *Ralstonia solanacearum* Phc cell density sensing system.  
729 *Mol. Microbiol.* **38**, 359–367 (2000).
- 730 26. Mishra, R. P. N. *et al.* Genetic diversity of *Mimosa pudica* rhizobial symbionts in soils of  
731 French Guiana: investigating the origin and diversity of *Burkholderia phymatum* and  
732 other beta-rhizobia. *FEMS Microbiol. Ecol.* **79**, 487–503 (2012).
- 733 27. Bontemps, C. *et al.* *Burkholderia* species are ancient symbionts of legumes. *Mol. Ecol.*  
734 **19**, 44–52 (2010).
- 735 28. Peeters, N., Guidot, A., Vailleau, F. & Valls, M. *Ralstonia solanacearum*, a widespread  
736 bacterial plant pathogen in the post-genomic era. *Mol. Plant Pathol.* **14**, 651–662 (2013).
- 737 29. Perrier, A. *et al.* Enhanced in planta fitness through adaptive mutations in EfpR, a dual  
738 regulator of virulence and metabolic functions in the plant pathogen *Ralstonia*  
739 *solanacearum*. *PLOS Pathog.* **12**, e1006044 (2016).
- 740 30. Clough, S. J., Lee, K.-E., Schell, M. A. & Denny, T. P. A two-component system in  
741 *Ralstonia* (*Pseudomonas*) *solanacearum* modulates production of PhcA-regulated

- 742 virulence factors in response to 3-hydroxypalmitic acid methyl ester. *J. Bacteriol.* **179**,  
743 3639–3648 (1997).
- 744 31. Tenaillon, O. *et al.* The molecular diversity of adaptive convergence. *Science* **335**, 457–  
745 461 (2012).
- 746 32. Dalia, A. B., McDonough, E. & Camilli, A. Multiplex genome editing by natural  
747 transformation. *Proc. Natl. Acad. Sci.* **111**, 8937–8942 (2014).
- 748 33. Daubech, B. *et al.* Spatio-temporal control of mutualism in legumes helps spread  
749 symbiotic nitrogen fixation. *eLife* **6**, e28683 (2017).
- 750 34. Simpson, J. T. *et al.* ABySS: A parallel assembler for short read sequence data. *Genome*  
751 *Res.* **19**, 1117–1123 (2009).
- 752 35. Peng, Y., Leung, H. C., Yiu, S.-M. & Chin, F. Y. IDBA-UD: a de novo assembler for  
753 single-cell and metagenomic sequencing data with highly uneven depth. *Bioinformatics*  
754 **28**, 1420–1428 (2012).
- 755 36. Koren, S. *et al.* Canu: scalable and accurate long-read assembly via adaptive k-mer  
756 weighting and repeat separation. *bioRxiv* 071282 (2017).
- 757 37. Margulies, M. *et al.* Genome sequencing in microfabricated high-density picolitre  
758 reactors. *Nature* **437**, 376–380 (2005).
- 759 38. Luo, R. *et al.* SOAPdenovo2: an empirically improved memory-efficient short-read de  
760 novo assembler. *Gigascience* **1**, 18 (2012).
- 761 39. Vallenet, D. *et al.* MicroScope-an integrated microbial resource for the curation and  
762 comparative analysis of genomic and metabolic data. *Nucleic Acids Res.* **41**, D636–D647  
763 (2013).
- 764 40. Bocs, S. AMIGene: Annotation of Microbial Genes. *Nucleic Acids Res.* **31**, 3723–3726  
765 (2003).

- 766 41. Hyatt, D. *et al.* Prodigal: prokaryotic gene recognition and translation initiation site  
767 identification. *BMC Bioinformatics* **11**, 119 (2010).
- 768 42. Lagesen, K. *et al.* RNAmmer: consistent and rapid annotation of ribosomal RNA genes.  
769 *Nucleic Acids Res.* **35**, 3100–3108 (2007).
- 770 43. Lowe, T. M. & Eddy, S. R. tRNAscan-SE: a program for improved detection of transfer  
771 RNA genes in genomic sequence. *Nucleic Acids Res.* **25**, 955–964 (1997).
- 772 44. Mariette, J. *et al.* NG6: Integrated next generation sequencing storage and processing  
773 environment. *BMC Genomics* **13**, 462 (2012).
- 774 45. Rocha, E. P. C. Inference and analysis of the relative stability of bacterial chromosomes.  
775 *Mol. Biol. Evol.* **23**, 513–522 (2005).
- 776 46. Miele, V., Penel, S. & Duret, L. Ultra-fast sequence clustering from similarity networks  
777 with SiLiX. *BMC Bioinformatics* **12**, 116 (2011).
- 778 47. Edgar, R. C. MUSCLE: multiple sequence alignment with high accuracy and high  
779 throughput. *Nucleic Acids Res.* **32**, 1792–1797 (2004).
- 780 48. Nguyen, L.-T., Schmidt, H. A., von Haeseler, A. & Minh, B. Q. IQ-TREE: a fast and  
781 effective stochastic algorithm for estimating maximum-likelihood phylogenies. *Mol. Biol.*  
782 *Evol.* **32**, 268–274 (2015).
- 783 49. Minh, B. Q., Nguyen, M. A. T. & von Haeseler, A. Ultrafast approximation for  
784 phylogenetic bootstrap. *Mol. Biol. Evol.* **30**, 1188–1195 (2013).
- 785 50. Nawrocki, E. P. & Eddy, S. R. Infernal 1.1: 100-fold faster RNA homology searches.  
786 *Bioinformatics* **29**, 2933–2935 (2013).
- 787 51. Nawrocki, E. P. *et al.* Rfam 12.0: updates to the RNA families database. *Nucleic Acids*  
788 *Res.* **43**, D130–D137 (2015).
- 789 52. Ochman, H. & Wilson, A. C. Evolution in Bacteria: evidence for a universal substitution  
790 rate in cellular genomes. *J. Mol. Evol.* **26**, 74–86 (1987).

- 791 53. Sheetlin, S. L., Park, Y., Frith, M. C. & Spouge, J. L. Frameshift alignment: statistics and  
792 post-genomic applications. *Bioinformatics* **30**, 3575–3582 (2014).
- 793 54. Csuros, M. Count: evolutionary analysis of phylogenetic profiles with parsimony and  
794 likelihood. *Bioinformatics* **26**, 1910–1912 (2010).
- 795 55. Snel, B., Bork, P. & Huynen, M. A. Genome phylogeny based on gene content. *Nat.*  
796 *Genet.* **21**, 108–110 (1999).
- 797 56. Richter, M. & Rosselló-Móra, R. Shifting the genomic gold standard for the prokaryotic  
798 species definition. *Proc. Natl. Acad. Sci.* **106**, 19126–19131 (2009).
- 799 57. Bruen, T. C. A simple and robust statistical test for detecting the presence of  
800 recombination. *Genetics* **172**, 2665–2681 (2005).
- 801 58. Didelot, X. & Wilson, D. J. ClonalFrameML: efficient inference of recombination in  
802 whole bacterial genomes. *PLOS Comput. Biol.* **11**, e1004041 (2015).
- 803 59. Pfeifer, B., Wittelsburger, U., Ramos-Onsins, S. E. & Lercher, M. J. PopGenome: an  
804 efficient swiss army knife for population genomic analyses in R. *Mol. Biol. Evol.* **31**,  
805 1929–1936 (2014).
- 806 60. Yang, Z., Nielsen, R., Goldman, N. & Pedersen, A.-M. K. Codon-substitution models for  
807 heterogeneous selection pressure at amino acid sites. *Genetics* **155**, 431–449 (2000).
- 808 61. Anisimova, M., Nielsen, R. & Yang, Z. Effect of recombination on the accuracy of the  
809 likelihood method for detecting positive selection at amino acid sites. *Genetics* **164**,  
810 1229–1236 (2003).
- 811 62. Tatusov, R. L., Koonin, E. V. & Lipman, D. J. A genomic perspective on protein families.  
812 *Science* **278**, 631–637 (1997).
- 813 63. Yu, N. Y. *et al.* PSORTb 3.0: improved protein subcellular localization prediction with  
814 refined localization subcategories and predictive capabilities for all prokaryotes.  
815 *Bioinformatics* **26**, 1608–1615 (2010).

- 816 64. Ren, Q., Chen, K. & Paulsen, I. T. TransportDB: a comprehensive database resource for  
817 cytoplasmic membrane transport systems and outer membrane channels. *Nucleic Acids*  
818 *Res.* **35**, D274–D279 (2007).
- 819 65. Barakat, M., Ortet, P. & Whitworth, D. E. P2RP: a web-based framework for the  
820 identification and analysis of regulatory proteins in prokaryotic genomes. *BMC Genomics*  
821 **14**, 269 (2013).
- 822 66. Abby, S. S. *et al.* Identification of protein secretion systems in bacterial genomes. *Sci.*  
823 *Rep.* **6**, 23080 (2016).
- 824 67. Peeters, N. *et al.* Repertoire, unified nomenclature and evolution of the Type III effector  
825 gene set in the *Ralstonia solanacearum* species complex. *BMC Genomics* **14**, 1 (2013).
- 826 68. Yoshimochi, T., Hikichi, Y., Kiba, A. & Ohnishi, K. The global virulence regulator PhcA  
827 negatively controls the *Ralstonia solanacearum* *hrp* regulatory cascade by repressing  
828 expression of the PrhIR signaling proteins. *J. Bacteriol.* **191**, 3424–3428 (2009).
- 829 69. Huang, J., Yindeeyoungyeon, W., Garg, R. P., Denny, T. P. & Schell, M. A. Joint  
830 transcriptional control of *xpsR*, the unusual signal integrator of the *Ralstonia*  
831 *solanacearum* virulence gene regulatory network, by a response regulator and a LysR-  
832 type transcriptional activator. *J. Bacteriol.* **180**, 2736–2743 (1998).
- 833 70. Brumbley, S. M. & Denny, T. P. Cloning of wild-type *Pseudomonas solanacearum* *phcA*,  
834 a gene that when mutated alters expression of multiple traits that contribute to virulence.  
835 *J. Bacteriol.* **172**, 5677–5685 (1990).
- 836 71. Huang, J., Carney, B. F., Denny, T. P., Weissinger, A. K. & Schell, M. A. A complex  
837 network regulates expression of *eps* and other virulence genes of *Pseudomonas*  
838 *solanacearum*. *J. Bacteriol.* **177**, 1259–1267 (1995).
- 839 72. Yao, J. & Allen, C. Chemotaxis Is required for virulence and competitive fitness of the  
840 bacterial wilt pathogen *Ralstonia solanacearum*. *J. Bacteriol.* **188**, 3697–3708 (2006).



- 841 73. Poueymiro, M. & Genin, S. Secreted proteins from *Ralstonia solanacearum*: a hundred  
842 tricks to kill a plant. *Curr. Opin. Microbiol.* **12**, 44–52 (2009).
- 843 74. Gonzalez, E. T., Brown, D. G., Swanson, J. K. & Allen, C. Using the *Ralstonia*  
844 *solanacearum* Tat secretome to identify bacterial wilt virulence factors. *Appl. Environ.*  
845 *Microbiol.* **73**, 3779–3786 (2007).
- 846 75. Cury, J., Touchon, M. & Rocha, E. P. C. Integrative and conjugative elements and their  
847 hosts: composition, distribution and organization. *Nucleic Acids Res.* **45**, 8943–8956  
848 (2017).
- 849 76. Taboada, B., Ciria, R., Martinez-Guerrero, C. E. & Merino, E. ProOpDB: Prokaryotic  
850 Operon DataBase. *Nucleic Acids Res.* **40**, D627–D631 (2012).
- 851 77. Benjamini, Y. & Hochberg, Y. Controlling the false discovery rate: a practical and  
852 powerful approach to multiple testing. *J. R. Stat. Soc. Ser. B* 289–300 (1995).
- 853
